# Supplementary material for: Absorptive carbon nanotube electrodes: Consequences of optical interference loss in thin film solar cells
Source: Royal Society of Chemistry journal article supplement (doi:10.1039/c5nr01119a), 2015-01-01
Supplement: c5nr01119a1.pdf [file c5nr01119a1.pdf]

# Supporting Information:

## Absorptive Carbon Nanotube Electrodes: Consequences of Optical Interference Loss in Thin Film Solar Cells

*Jeffrey G. Tait,<sup>a,b</sup> Michaël De Volder,<sup>c</sup> David Cheyns,<sup>b</sup> Paul Heremans,<sup>a,b\*</sup> Barry P. Rand<sup>d\*</sup>*

<sup>a</sup>Dept. of Electrical Engineering, KULEuven, Kasteelpark Arenberg 10, Leuven, B-3001 Belgium

<sup>b</sup>IMEC, Kapeldreef 75, Leuven, B-3001, Belgium

<sup>c</sup>Dept. of Engineering, University of Cambridge, 17 Charles Babbage Road, Cambridge, CB3 0FS, UK

<sup>d</sup>Dept. of Electrical Engineering and Andlinger Center for Energy and the Environment, Princeton University, Princeton, NJ, 08544 USA

\* Corresponding author: [paul.heremans@imec.be](mailto:paul.heremans@imec.be), [brand@princeton.edu](mailto:brand@princeton.edu)

**Video S1.** An animation of the ultrasonic spray coating of MWCNTs through a mask is included in the supporting information.

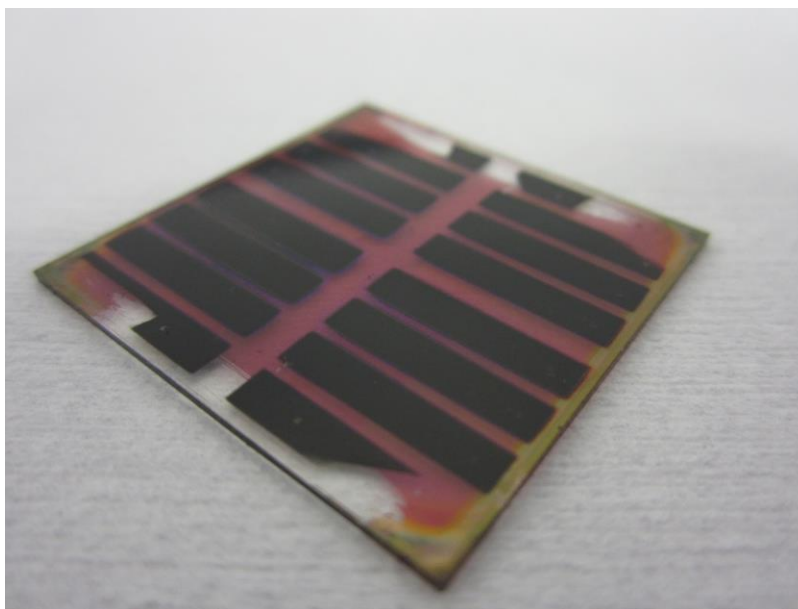

**Figure S1.** Photograph of devices fabricated with sprayed absorptive MWCNT electrodes. The substrate is 3x3 cm.

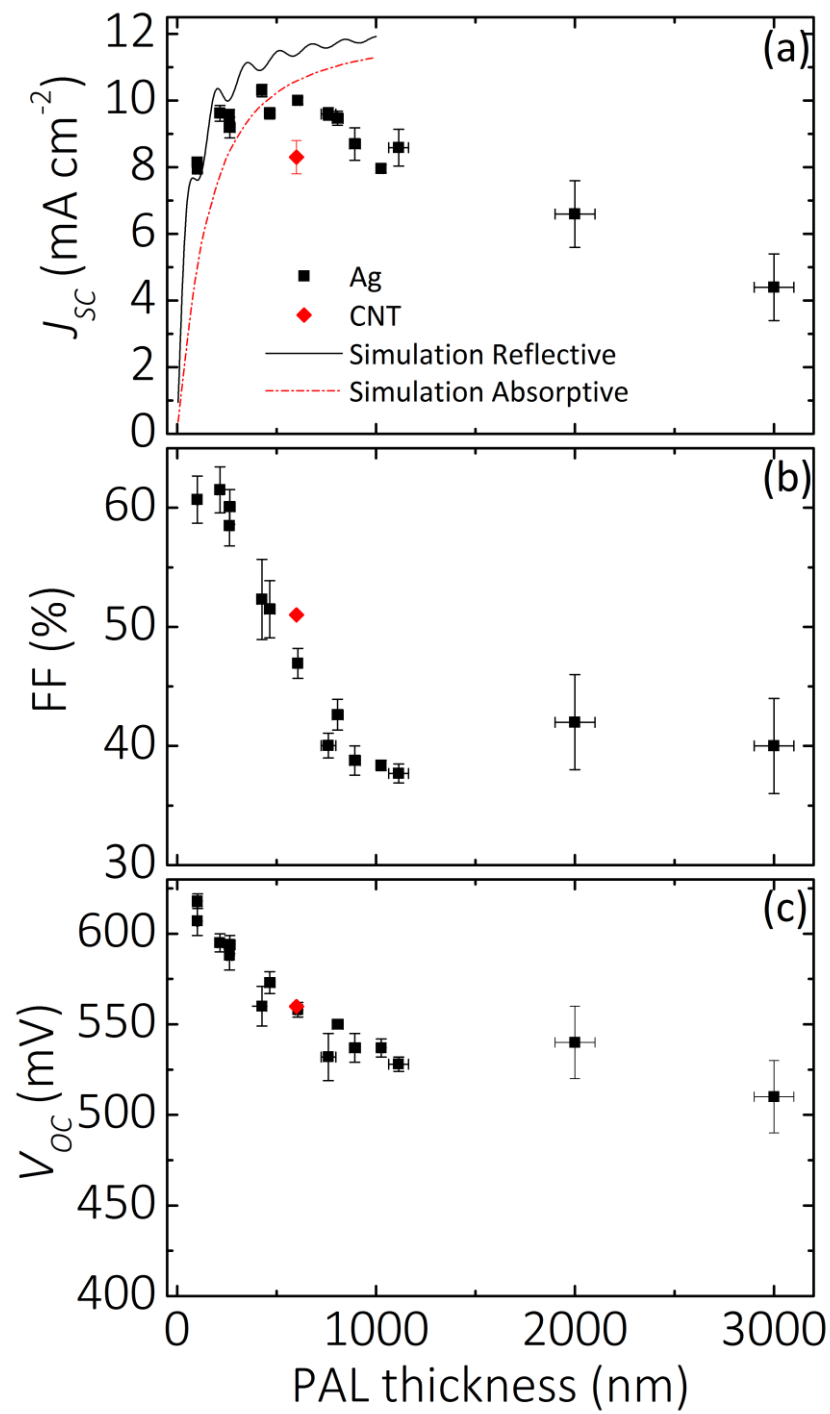

**Figure S2.** Plots of (a) short circuit current density ( $J_{sc}$ ), (b) fill factor (FF), and (c) open circuit voltage ( $V_{oc}$ ) vs. PAL thickness for measured inverted architecture devices with Ag (black squares) and CNT (red diamonds) electrodes. Optically simulated  $J_{sc}$  values for the reflective (solid black line) and absorptive (dashed red line) electrode devices are shown.

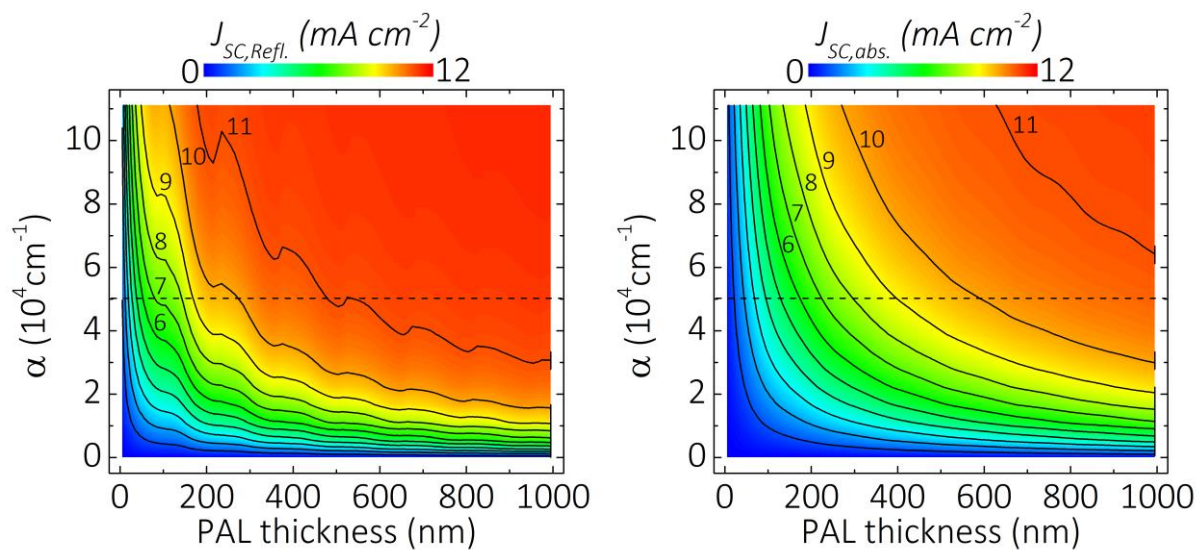

**Figure S3.** Contour plot showing the simulated maximum  $J_{sc}$  reflective Ag (left) and absorptive (right) electrodes as a function of thickness and absorption strength, signified by the absorption coefficient ( $\alpha$ ) at 563 nm (peak of P3HT:PCBM absorption). The dashed contour line represents the measured absorption coefficient of  $5 \times 10^4$  cm<sup>-1</sup> of P3HT:PCBM.

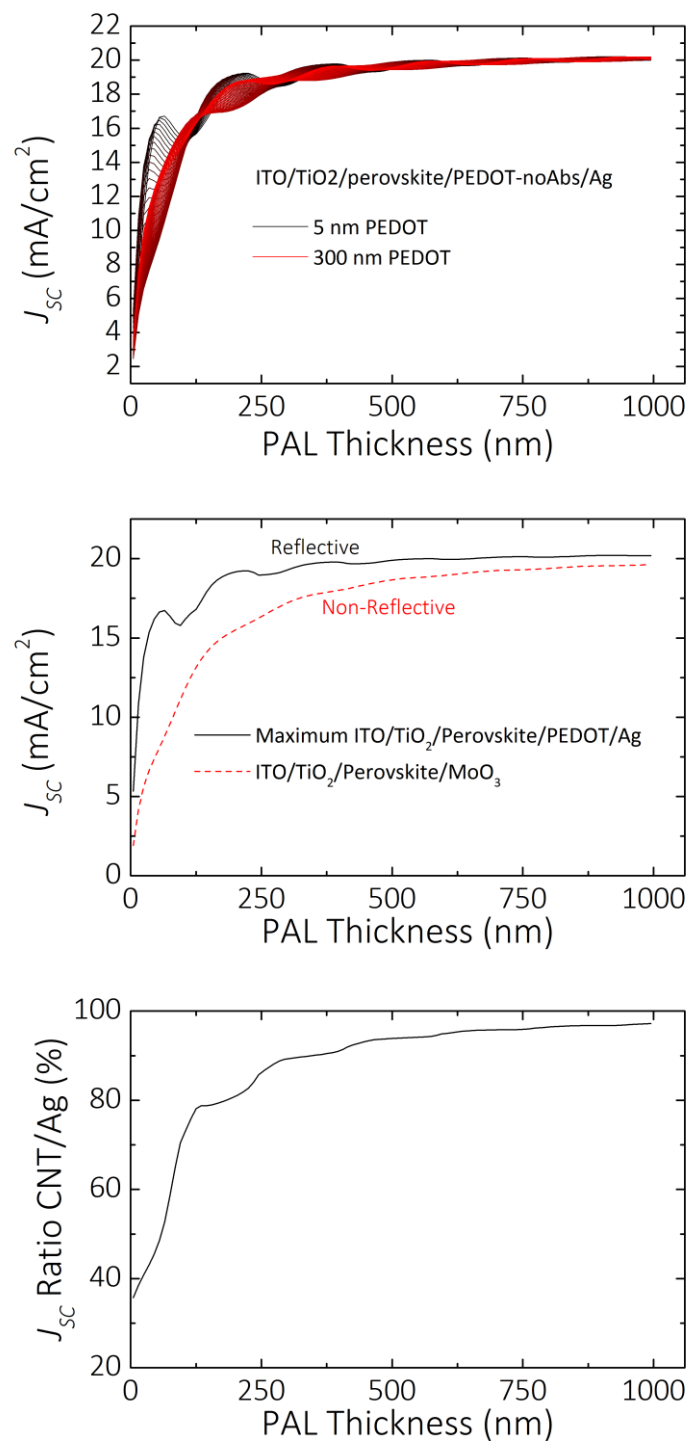

**Figure S4.** The top figure shows optically simulated  $J_{sc}$  production of perovskite-based photovoltaic devices as a function of PAL thickness, red to black curves show varied thickness of a non-absorbing PEDOT:PSS-like optical spacer. The middle figure shows the maximum  $J_{sc}$  for all simulated thicknesses PEDOT thickness, along with the production with a perfect absorber top contact. The bottom figure shows the ratio of absorptive to reflective electrode devices.

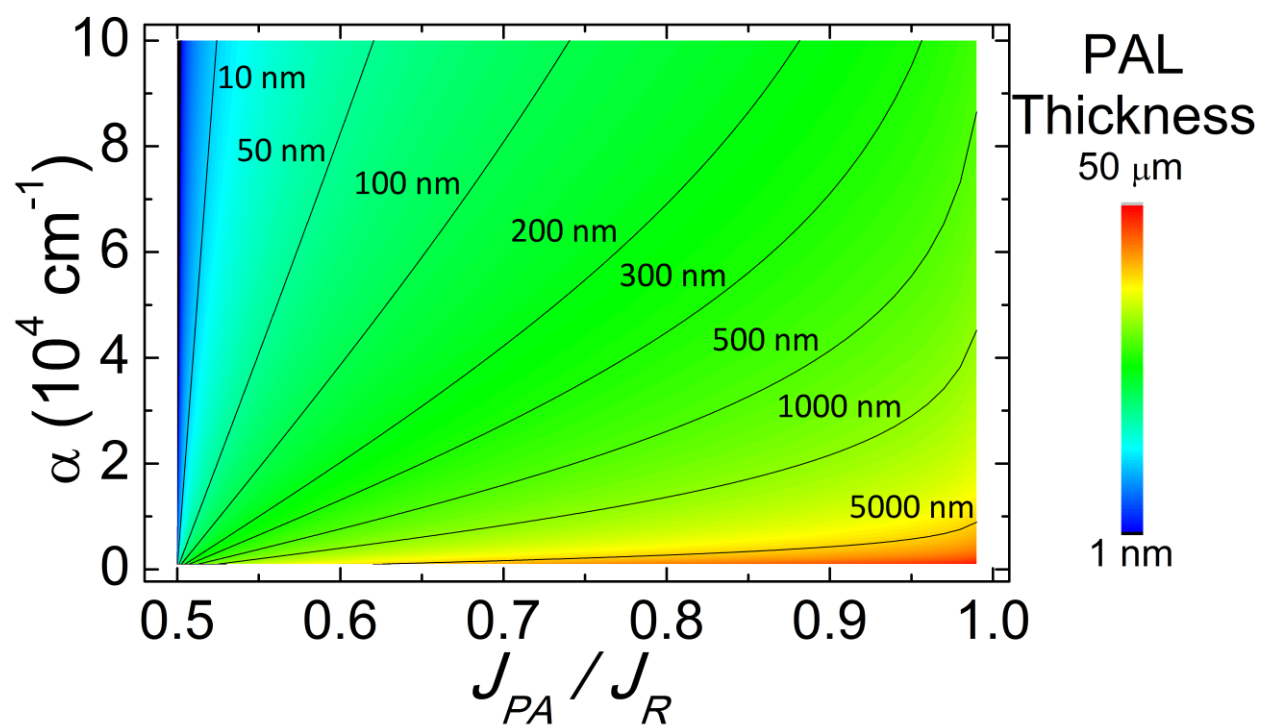

**Figure S5.** Contour plot of the simplified equation for the ratio of photocurrents produced in devices with a perfect absorber vs. a reflective Ag electrode. The y-axis is the absorption coefficient at a specific wavelength, the x-axis is the ratio of photocurrents, and the z-axis color spectrum is the photoactive layer thickness required to achieve the x- and y-axis specifications. The z-axis is logarithmic and has contour lines on the plot.
